RESEARCH ARTICLE

# Time-sensitive predictors of embolism in patients with left-sided endocarditis: Cohort study

Alvin Yang<sup>1</sup>, Charlie Tan<sup>2</sup>, Neill K. J. Adhikari<sup>3,4</sup>\*, Nick Daneman<sup>5</sup>, Ruxandra Pinto<sup>3</sup>, Bennett K. M. Haynen<sup>6</sup>, Gideon Cohen<sup>7</sup>, Mark S. Hansen<sup>8</sup>

**1** Faculty of Medicine, University of Toronto, Toronto, Ontario, Canada, **2** Sunnybrook Research Institute, Sunnybrook Health Sciences Centre, Toronto, Ontario, Canada, **3** Department of Critical Care Medicine, Sunnybrook Health Sciences Centre, Toronto, Ontario, Canada, **4** Interdepartmental Division of Critical Care Medicine, University of Toronto, Toronto, Ontario, Canada, **5** Division of Infectious Diseases, Sunnybrook Health Sciences Centre and University of Toronto, Toronto, Ontario, Canada, **6** Division of Cardiology, Niagara Health and McMaster University, St. Catharines, Ontario, Canada, **7** Division of Cardiac Surgery, Sunnybrook Health Sciences Centre and University of Toronto, Toronto, Ontario, Canada, **8** Division of Cardiology, Sunnybrook Health Sciences Centre and University of Toronto, Toronto, Ontario, Canada

\* These authors contributed equally to this work.

\* [neill.adhikari@utoronto.ca](mailto:neill.adhikari@utoronto.ca)

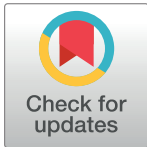

**OPEN ACCESS**

**Citation:** Yang A, Tan C, Adhikari NKJ, Daneman N, Pinto R, Haynen BKM, et al. (2019) Time-sensitive predictors of embolism in patients with left-sided endocarditis: Cohort study. PLoS ONE 14(4): e0215924. <https://doi.org/10.1371/journal.pone.0215924>

**Editor:** Salah A.M. Said, Ziekenhuisgroep Twente, NETHERLANDS

**Received:** December 12, 2018

**Accepted:** April 10, 2019

**Published:** April 25, 2019

**Copyright:** © 2019 Yang et al. This is an open access article distributed under the terms of the [Creative Commons Attribution License](https://creativecommons.org/licenses/by/4.0/), which permits unrestricted use, distribution, and reproduction in any medium, provided the original author and source are credited.

**Data Availability Statement:** All relevant data are within the manuscript and its Supporting Information files.

**Funding:** This work was supported by the D+H Summer Student Research Program at Sunnybrook Research Institute, awarded to AY (no grant number). The funder had no role in study design, data collection and analysis, decision to publish, or preparation of the manuscript.

**Competing interests:** The authors have declared that no competing interests exist.

## Abstract

### Introduction

Accurate prediction of embolic events in infective endocarditis could inform critical clinical decisions, such as the timing of cardiac surgical intervention. However, many embolic events occur before hospital admission and echocardiography and are thus non-modifiable. We aimed to identify time-sensitive variables that predict embolic events in infective endocarditis, focusing on those that occur after diagnosis.

### Methods

Clinical, microbiological, and echocardiographic characteristics were collected from 116 patients with definite or probable left-sided infective endocarditis admitted to Sunnybrook Health Sciences Centre (Toronto, Canada) between October 2013 and July 2016; associations between these characteristics and embolic events were identified using simple logistic regression.

### Results

The mean (SD) age was 66 (17) years; 82 patients (71%) were men. The most frequent microorganisms were *Staphylococcus aureus* (23%) and viridans group streptococci (21%). Seventy-nine (68%) patients had left-sided vegetations, with involvement of the aortic valve in 34 (43%) patients, mitral valve in 37 (47%) patients, and both in 8 (10%) patients. The mean (SD) vegetation size was 10 (7) mm. Forty-three unique patients (37%) had 50 embolic events, with most (34/43; 79%) having a first embolic event (38/50; 76%) before or on the day of echocardiography. There were no significant predictors of the 11 patients with

an embolic event after echocardiography; significant predictors of an embolic event at any time were single valve vegetation vs. no vegetation (OR, 4.75; 95% confidence interval [CI], 1.76–12.78) and, among patients with a vegetation, mitral vs. aortic valve location (OR, 4.43; 95%CI, 1.63–12.04).

## Conclusions

Associations between patient and echocardiographic characteristics and embolism in patients with infective endocarditis may be time-sensitive, as few embolic events occurred after clinical and echocardiographic assessment.

## Introduction

Infective endocarditis (IE) is characterized by high morbidity and mortality despite advances in medical and surgical care [1]. Among the most common and catastrophic complications of IE are embolic events (EEs). Echocardiographic variables associated with EEs include vegetation size [2–5], mobility [4, 6, 7], and mitral location [8–12]. Other clinical variables associated with EEs include *Staphylococcus aureus* infection [2, 6, 7, 9, 12–18], age [2, 18, 19], intravenous drug use (IVDU) [16, 20], and prosthetic valve IE [12, 17, 21].

Early surgery for IE patients at highest risk of EEs has been recommended in consensus guidelines [1, 22, 23]. However, many embolic complications of IE occur around the time of presentation and prior to echocardiography, reducing the clinical utility of EE prediction rules given that such EEs are not modifiable [3, 12, 15, 17, 21, 24, 25]. We therefore sought to identify variables predictive of EEs following the diagnosis of IE (primary objective), since these may be of the greatest utility to inform clinical decisions, including the timing of surgery.

## Materials and methods

### Study design and setting

We conducted a cohort study of patients with IE admitted to Sunnybrook Health Sciences Centre (SHSC), a tertiary care university-affiliated hospital in Toronto, Canada. We assessed the association between clinical, microbiological, and echocardiographic features and the risk of EEs; the primary analysis focused on new EEs occurring after echocardiography. The study was approved by the SHSC Research Ethics Board. The reporting of this study conforms to the STROBE statement [26] (Checklist in [S1 Appendix](#)).

### Patient identification

We included patients admitted to SHSC between 1 October 2013 and 1 July 2016 who met definite modified Duke criteria or probable criteria with strong clinical suspicion for active left-sided IE [27]. Patients admitted 1 October 2013 to 30 June 2015 were identified retrospectively by searching electronic discharge summaries for International Statistical Classification of Diseases and Related Health Problems (ICD-10-CM) codes I33 and I39, which have been validated for identification of patients with IE [28]. For patients with multiple encounters, the first was counted. Additional potential IE cases were captured by screening a hospital registry of heart valve surgeries and the microbiology database for blood cultures positive for microorganisms associated with IE (*Staphylococcus aureus*, *Streptococcus gallolyticus* (formerly *bovis*), HACEK organisms, *Enterococcus* spp., viridans group streptococci). Between 1 July 2015 and 1

July 2016, patients were identified prospectively by notification from the cardiac surgery, cardiology, or infectious diseases services, as part of a multi-disciplinary IE quality improvement program [29].

### Patient and pathogen characteristics

Patient characteristics were abstracted from electronic and paper medical records. Demographic factors included age, sex, and source of admission (direct vs. transfer from another hospital); comorbidities and risk factors included coronary artery disease, coronary artery bypass grafting, unrepaired valve lesion, prosthetic valve, intracardiac device, previous IE, intravenous drug use (IVDU), intravenous instrumentation (e.g., hemodialysis or central venous catheter), hypertension, diabetes mellitus, cerebrovascular disease, chronic kidney disease, liver disease, chronic obstructive pulmonary disease, and malignancy. We also recorded the timing of cardiac surgery for endocarditis, if performed. Microbiologic etiology was determined by microorganisms isolated from blood cultures performed using BACTEC 9240 system (Becton Dickinson Diagnostic Instruments Systems, USA), in accordance with Clinical Laboratory Standards Institute guidelines. Microorganisms were identified by VITEK 2 (model 510731-9EN1, bioMérieux Inc., USA).

### Echocardiographic characteristics

Transthoracic (2D) or transesophageal (2D or 3D) echocardiography was performed on all patients using Philips Medical IE33 equipment (Philips, Netherlands) and reviewed by two Level 3 certified cardiologists (BKMH and MSH); disagreements were resolved by consensus. Vegetations located on mitral or aortic valve leaflets were included, and right-sided vegetations were excluded from the analyses. Vegetation size was measured in multiple planes to determine the maximum length. In the case of multiple vegetations, the location and length of the largest vegetation was used. Mobility was described as follows: *Grade 1 (absent)*: fixed with no detectable independent motion; *Grade 2 (low)*: fixed base with mobile free edge; *Grade 3 (moderate)*: pedunculated vegetation that remains within the same chamber throughout the cardiac cycle; *Grade 4 (severe)*: prolapsing vegetations that cross the leaflet coaptation plane [18]. The extent of vegetation was categorized as follows: *Grade 1*: single vegetation; *Grade 2*: multiple vegetations limited to a single valve leaflet; *Grade 3*: involvement of multiple valve leaflets; *Grade 4*: vegetation that extends to extravalvular structures [18]. Fig 1 and S1 Video show a mitral valve vegetation that is Grade 1 in mobility and extent, and Fig 2 and S2 Video show multiple mitral valve vegetations on one leaflet (Grade 2 extent) that are Grade 4 in mobility.

### Outcomes

The primary outcome was the occurrence of an EE (stroke or major arterial embolic complication) determined clinically at least one day after echocardiography (referred to as ‘after echocardiography’) and within 6 weeks of admission. Patients with several EEs were counted as having experienced the primary outcome if one EE occurred in the above timing window. Minor embolic lesions (e.g. cutaneous lesions, splenic or renal infarcts) or clinically silent emboli were not considered. The secondary outcome included all EEs, regardless of timing.

### Statistical analysis

The number of patients with IE at SHSC during the study period determined the sample size. Continuous data are summarized as mean (standard deviation, SD) if normally distributed or median (first quartile, third quartile [Q1, Q3]) if not normally distributed. Categorical data are

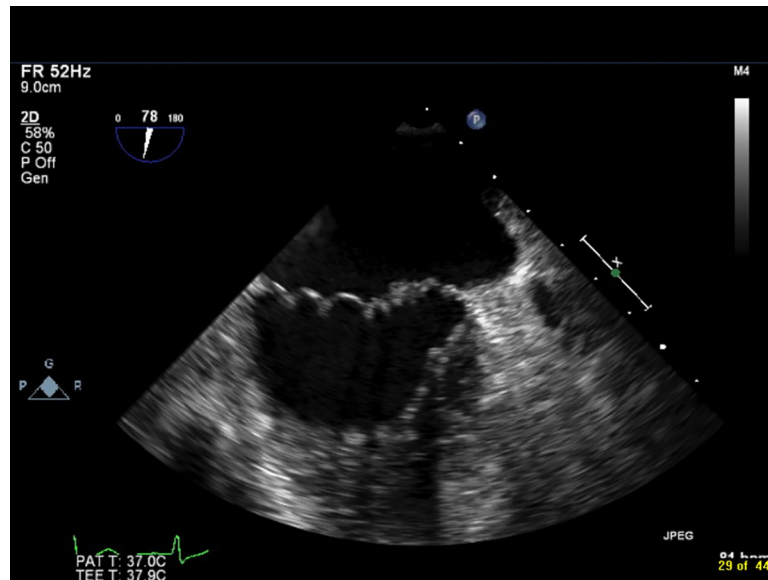

**Fig 1.** Example of a small fixed mitral valve vegetation (Grade 1 for both mobility and extent).

<https://doi.org/10.1371/journal.pone.0215924.g001>

summarized as counts and percentages. There were no missing data for the exposures and outcomes of interest. Patients with >1 EE were counted once in the analysis, with the first EE analyzed, unless the subsequent EE occurred after echocardiography, in which case the subsequent EE is counted as the primary outcome. For echocardiographic characteristics, we used simple logistic regression to report the odds ratio (OR) and 95% confidence interval (CI) for the association of patient, pathogen, and echocardiographic characteristics with EEs. When any level of a factor had no EEs, we used exact logistic regression to handle the problem of quasi-complete separation that occurs with standard logistic regression. Multivariable analysis was not performed given a limited sample size. A *p* value <0.05 was considered statistically

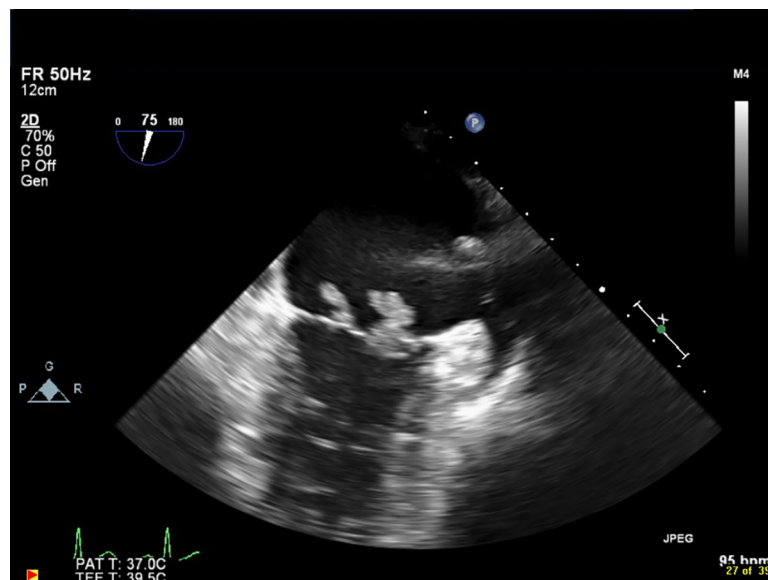

**Fig 2.** Example of large multiple mobile mitral valve vegetations (Grade 4 for mobility and Grade 2 for extent).

<https://doi.org/10.1371/journal.pone.0215924.g002>

significant. All analyses were performed with Microsoft Excel (Microsoft Corporation, Redmond, WA, USA) and SAS version 9.4 (SAS, Cary, NC, USA).

## Results

### Patient and pathogen characteristics

A total of 116 patients were enrolled, including 80 patients (69%) with definite IE and 36 patients (31%) with probable IE. There were 82 men (71%) and 34 women (29%). The mean (SD) age was 66 (17) years. The most frequent comorbidities were hypertension ( $n = 61$ , 53%), prosthetic valve ( $n = 39$ , 34%), coronary artery disease ( $n = 34$ , 29%), malignancy ( $n = 29$ , 25%), cerebrovascular disease ( $n = 28$ , 24%), and diabetes mellitus ( $n = 27$ , 23%). The most frequent causative microorganisms were *Staphylococcus aureus* ( $n = 27$ , 23%), viridans group streptococci ( $n = 24$ , 21%), and *Enterococcus spp.* ( $n = 19$ , 16%). Additional clinical and microbiological characteristics are summarized in [Table 1](#). Cardiac surgery was performed for 29 (25%) patients at a median (Q1, Q3) of 6 (3, 13) days after admission.

### Echocardiographic characteristics

Echocardiography was performed a median (Q1, Q3) of 3 (1, 5.5) days after admission, including one patient who was scanned at a referring hospital and admitted the following day to SHSC. Vegetations were detected in 79 patients (68%), of whom 37 (47%) had isolated mitral involvement, 34 (43%) had isolated aortic involvement, and 8 (10%) had bi-valvular involvement ([Table 2](#)). There were 63 patients (80%) with native valve involvement and 16 patients (20%) with prosthetic valve involvement. Vegetation size was  $\geq 10$  mm in 32 patients (40%) and  $< 10$  mm in 47 patients (60%), with a mean (SD) size of 10 (7) mm. Thirty-six patients (46%) had low (grades 1 or 2) vegetation mobility, while 43 patients (54%) had high (grades 3 or 4) mobility; 53 patients (67%) had low (grades 1 or 2) vegetation extent, while 26 patients (33%) had high (grades 3 or 4) extent. Thirty-seven patients (32%) had no vegetation detected (11/80 [14%] of patients with definite IE, 26/36 [72%] of patients with probable IE).

### Embolic events (EEs)

Forty-three patients (37%) had EEs, with the majority experiencing the first EE before or on the day of hospital admission (30/43, 70%) and before or on the day of echocardiography (34/43, 79%). Seven (16%) patients experienced 2 EEs, of whom 4 (9%) had both EEs before or on the day of echocardiography, 2 (5%) had an EE both before and after echocardiography, and 1 (2%) had both EEs after echocardiography. Eleven patients met the primary outcome definition of having an EE after echocardiography, including 2 patients who also had an EE before echocardiography. The clinical course of patients with the primary outcome is summarized in [Table A](#) in [S1 Appendix](#); in 10 of 11 patients an EE was a stroke. In total, there were 50 EEs, including 47 (94%) strokes, 2 (4%) ischemic limb events, and 1 (2%) ischemic bowel event. Twelve (24%), 18 (36%), and 20 (40%) EEs occurred before, on the day of, and after admission, respectively. Thirty-four (68%), 4 (8%), and 12 (24%) EEs occurred before, on the day of, and after echocardiography, respectively ([Fig 3](#)).

### Clinical and microbiological variables associated with EEs

As presented in [Table 1](#), patients who met definite Duke criteria had a higher risk of any EE (before or after hospital admission) than those who only met probable Duke criteria (odds ratio [OR] 7.61; 95%CI, 2.46–23.51;  $p < 0.001$ ). Decreased probability of any EE was associated with malignancy (OR 0.20; 95%CI, 0.06–0.61;  $p = 0.0051$ ) and *Enterococcus spp.* infection (OR

**Table 1. Patient and pathogen characteristics of patients with or without an embolic event at any time.**

| Characteristic                           | Total Sample (n = 116) | Patients with EE (n = 43) | Patients without EE (n = 73) | Odds Ratio (95% CI) | P value |
|------------------------------------------|------------------------|---------------------------|------------------------------|---------------------|---------|
| <b>Demographic characteristics</b>       |                        |                           |                              |                     |         |
| Mean age in years (SD)                   | 66 (17)                | 63 (17)                   | 67 (17)                      | 0.99 (0.97–1.01)    | 0.25    |
| Men                                      | 82 (70.7%)             | 30 (69.8%)                | 52 (71.2%)                   | 0.93 (0.41–2.13)    | 0.87    |
| Direct admission                         | 71 (61.2%)             | 24 (55.8%)                | 47 (64.4%)                   | 0.70 (0.32–1.51)    | 0.36    |
| Definite Duke criteria                   | 80 (69.0%)             | 39 (90.7%)                | 41 (56.2%)                   | 7.61 (2.46–23.51)   | <0.001  |
| <b>Comorbidities and risk factors</b>    |                        |                           |                              |                     |         |
| Coronary artery disease                  | 34 (29.3%)             | 11 (25.6%)                | 23 (31.5%)                   | 0.75 (0.32–1.74)    | 0.50    |
| Coronary artery bypass grafting          | 15 (12.9%)             | 5 (11.6%)                 | 10 (13.7%)                   | 0.83 (0.26–2.61)    | 0.75    |
| Prosthetic valve(s)                      | 39 (33.6%)             | 15 (34.9%)                | 24 (32.9%)                   | 1.09 (0.49–2.42)    | 0.83    |
| Unrepaired valve lesion                  | 23 (19.8%)             | 9 (20.9%)                 | 14 (19.2%)                   | 1.12 (0.44–2.85)    | 0.82    |
| Intracardiac device                      | 13 (11.2%)             | 2 (4.7%)                  | 11 (15.1%)                   | 0.28 (0.06–1.31)    | 0.10    |
| Prior infective endocarditis             | 12 (10.3%)             | 4 (9.3%)                  | 8 (11.0%)                    | 0.83 (0.24–2.95)    | 0.78    |
| Intravenous drug use                     | 7 (6.0%)               | 4 (9.3%)                  | 3 (4.1%)                     | 2.39 (0.51–11.24)   | 0.27    |
| Intravenous instrumentation <sup>a</sup> | 6 (5.2%)               | 1 (2.3%)                  | 5 (6.8%)                     | 0.32 (0.04–2.87)    | 0.31    |
| Hypertension                             | 61 (52.6%)             | 27 (62.8%)                | 34 (46.6%)                   | 1.94(0.90–4.18)     | 0.093   |
| Diabetes mellitus                        | 27 (23.3%)             | 10 (23.3%)                | 17 (23.3%)                   | 1.00 (0.41–2.44)    | 1       |
| Cerebrovascular disease                  | 28 (24.1%)             | 12 (27.9%)                | 16 (21.9%)                   | 1.38 (0.58–3.28)    | 0.47    |
| Chronic kidney disease                   | 23 (19.8%)             | 5 (11.6%)                 | 18 (24.7%)                   | 0.40 (0.14–1.18)    | 0.089   |
| Liver disease                            | 12 (10.3%)             | 2 (4.7%)                  | 10 (13.7%)                   | 0.31 (0.06–1.48)    | 0.14    |
| Chronic obstructive pulmonary disease    | 7 (6.0%)               | 3 (7.0%)                  | 4 (5.5%)                     | 1.29 (0.28–6.08)    | 0.74    |
| Malignancy                               | 29 (25.0%)             | 4 (9.3%)                  | 25 (34.2%)                   | 0.20 (0.06–0.61)    | 0.0051  |
| Immunosuppression                        | 9 (7.8%)               | 3 (7.0%)                  | 6 (8.2%)                     | 0.84 (0.20–3.54)    | 0.81    |
| Obesity                                  | 7 (6.0%)               | 3 (7.0%)                  | 4 (5.5%)                     | 1.29 (0.28–6.08)    | 0.74    |
| <b>Microbiologic etiology</b>            |                        |                           |                              |                     |         |
| <i>Staphylococcus aureus</i>             | 27 (23.3%)             | 11 (25.6%)                | 16 (21.9%)                   | 1.23 (0.51–2.96)    | 0.65    |
| Coagulase-negative staphylococcus        | 7 (6.0%)               | 2 (4.7%)                  | 5 (6.9%)                     | 0.66 (0.12–3.58)    | 0.63    |
| <i>Enterococcus</i>                      | 19 (16.4%)             | 3 (7.0%)                  | 16 (21.9%)                   | 0.27 (0.07–0.98)    | 0.046   |
| Viridans group streptococcus             | 24 (20.7%)             | 10 (23.3%)                | 14 (19.2%)                   | 1.28 (0.51–3.19)    | 0.60    |
| HACEK group species <sup>b</sup>         | 2 (1.7%)               | 1 (2.3%)                  | 1 (1.4%)                     | 1.71 (0.10–28.13)   | 0.71    |
| Other microorganism                      | 32 (27.6%)             | 11 (25.6%)                | 21 (28.8%)                   | 0.85 (0.36–2.00)    | 0.71    |
| Culture-negative                         | 8 (6.9%)               | 5 (11.6%)                 | 3 (4.1%)                     | 3.07 (0.70–13.55)   | 0.14    |

CI, confidence interval; EE, embolic event

<sup>a</sup>Hemodialysis or central venous catheter

<sup>b</sup>*Haemophilus, Aggregatibacter, Cardiobacterium, Eikenella, and Kingella* spp.

<https://doi.org/10.1371/journal.pone.0215924.t001>

0.27; 95%CI, 0.07–0.98;  $p = 0.046$ ). There were no associations with any other comorbidities or causative microorganisms.

There were no significant differences in clinical or microbiological characteristics between patients with and without an EE occurring after echocardiography (Table B in S1 Appendix).

### Echocardiographic variables predictive of EEs after echocardiography

No factors were associated with a statistically significantly higher risk of subsequent EEs (Table 3), including single valve vegetation (OR 2.21; 95%CI, 0.48–14.06;  $p = 0.42$ ), mitral valve vegetation (OR 3.00; 95%CI, 0.49–22.46;  $p = 0.30$ ), and vegetation size  $\geq 10$  mm (OR 1.80; 95%CI, 0.39–8.25;  $p = 0.45$ ), mobility ( $p = 0.92$ ), and extent ( $p = 0.39$ ).

Table 2. Echocardiographic characteristics of patients with an embolic event occurring at any time.

| Echocardiographic Characteristic        | All patients (n = 116)                               | Patients with EE (n = 43) | Patients without EE (n = 73) | Odds Ratio (95% CI)           | P value       |
|-----------------------------------------|------------------------------------------------------|---------------------------|------------------------------|-------------------------------|---------------|
| <b>Number of valves with vegetation</b> |                                                      |                           |                              |                               | <b>0.0086</b> |
| None                                    | 37 (31.9%)                                           | 6 (14.0%)                 | 31 (42.5%)                   | 1                             |               |
| Single                                  | 71 (61.2%)                                           | 34 (79.1%)                | 37 (50.7%)                   | 4.75 (1.76–12.78)             | <b>0.0021</b> |
| Bi-valvular                             | 8 (6.9%)                                             | 3 (7.0%)                  | 5 (7.0%)                     | 3.10 (0.58–16.59)             | 0.19          |
|                                         | <b>Patients with valves with vegetation (n = 79)</b> | <b>(n = 37)</b>           | <b>(n = 42)</b>              |                               |               |
| <b>Valve type</b>                       |                                                      |                           |                              |                               |               |
| Native                                  | 63 (79.8%)                                           | 26 (70.3%)                | 37 (88.1%)                   | 1                             |               |
| Prosthetic                              | 16 (20.3%)                                           | 11 (29.7%)                | 5 (11.9%)                    | 3.13 (0.97–10.09)             | 0.056         |
| <b>Valve location</b>                   |                                                      |                           |                              |                               | <b>0.012</b>  |
| Aortic                                  | 34 (43.0%)                                           | 10 (27.03%)               | 24 (57.1%)                   | 1                             |               |
| Mitral                                  | 37 (46.8%)                                           | 24 (64.9%)                | 13 (31.0%)                   | 4.43 (1.63–12.04)             | <b>0.0035</b> |
| Bivalvular                              | 8 (10.1%)                                            | 3 (8.1%)                  | 5 (11.9%)                    | 1.44 (0.29–7.21)              | 0.66          |
| <b>Vegetation size</b>                  |                                                      |                           |                              |                               |               |
| Size <10 mm                             | 47 (59.5%)                                           | 20 (54.1%)                | 27 (64.3%)                   | 1                             |               |
| Size ≥10 mm                             | 32 (40.5%)                                           | 17 (46.0%)                | 15 (35.7%)                   | 1.53 (0.62–3.78)              | 0.36          |
| Size (mean, in mm)                      | 10.4 (6.6)                                           | 11.6 (7.6)                | 9.3 (5.4)                    | 1.06 (0.98–1.13) <sup>a</sup> | 0.13          |
| <b>Vegetation mobility</b>              |                                                      |                           |                              |                               | 0.81          |
| Grade 1                                 | 6 (7.6%)                                             | 3 (8.1%)                  | 3 (7.1%)                     | 1                             |               |
| Grade 2                                 | 30 (38.0%)                                           | 12 (32.4%)                | 18 (42.9%)                   | 0.67 (0.12–3.87)              | 0.65          |
| Grade 3                                 | 13 (16.5%)                                           | 7 (18.9%)                 | 6 (14.3%)                    | 1.17 (0.17–8.09)              | 0.88          |
| Grade 4                                 | 30 (38.0%)                                           | 15 (40.5%)                | 15 (35.7%)                   | 1.00 (0.17–5.77)              | 1.00          |
| <b>Vegetation extent</b>                |                                                      |                           |                              |                               | 0.38          |
| Grade 1                                 | 32 (40.5%)                                           | 12 (32.4%)                | 20 (47.6%)                   | 1                             |               |
| Grade 2                                 | 21 (26.6%)                                           | 13 (35.1%)                | 8 (19.1%)                    | 2.71 (0.87–8.43)              | 0.09          |
| Grade 3                                 | 21 (26.6%)                                           | 10 (27.0%)                | 11 (26.2%)                   | 1.52 (0.50–4.63)              | 0.47          |
| Grade 4                                 | 5 (6.3%)                                             | 2 (5.4%)                  | 3 (7.1%)                     | 1.11 (0.16–7.63)              | 0.91          |

CI, confidence interval; EE, embolic event

<sup>a</sup>Odds Ratio per 1-mm increase in vegetation size.

<https://doi.org/10.1371/journal.pone.0215924.t002>

### Echocardiographic variables associated with EEs at any time

Among all patients, single valve vs. no vegetation (OR 4.75; 95%CI, 1.76–12.78;  $p = 0.0021$ ) was associated with any EE. Among patients with a vegetation, mitral vs. aortic valve location (OR 4.43; 95%CI, 1.63–12.04;  $p = 0.0035$ ) was associated with higher risk of any EE. Vegetation size  $\geq 10$  mm (OR, 1.53; 95%CI, 0.62–3.78;  $p = 0.36$ ), mobility ( $p = 0.81$ ), and extent ( $p = 0.38$ ) demonstrated no statistically significant association (Table 2).

### Discussion

We investigated 116 patients with definite or probable IE to identify clinical, microbiological, and echocardiographic characteristics associated with EEs. EEs occurred in 37% of patients, congruent with previously reported rates of 18–44% [17, 24, 30, 31]. The large majority of EEs occurred before or on the day of hospital admission, thereby precipitating medical contact. We found several predictors of all EEs that were no longer statistically significant when considering only EEs that occurred after echocardiography, limiting their utility for clinical decision-making.

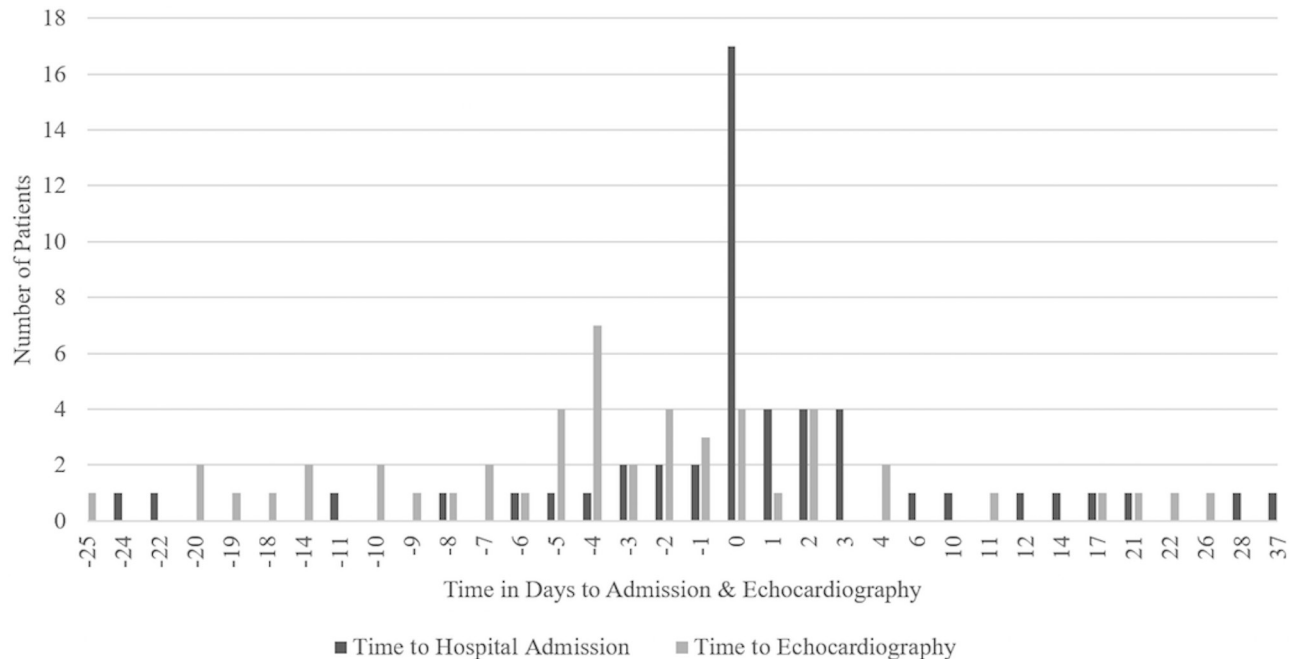

**Fig 3. Timing of EEs in relation to hospital admission and echocardiography.** Most EEs occurred before or on the day of admission or echocardiography. EE, embolic event.

<https://doi.org/10.1371/journal.pone.0215924.g003>

Echocardiographic variables predictive of EEs included single valve vegetation [3, 32] and mitral valve vegetation [8, 10–12], congruent with published findings; however, we observed that the relationship between the same variables and EEs subsequent to echocardiography was attenuated. Although this is likely a consequence of insufficient statistical power, an attenuated relationship between EEs after echocardiography and vegetation presence and location has been reported in larger sample sizes [4, 31]. The relationship between echocardiographic variables and subsequent EEs is likely to be complex and time-dependent; the apparent cause-and-effect of vegetation characteristics and embolization depends on when they are visualized. In our study, vegetation size  $\geq 10$  mm was not significantly associated with any EEs or only those occurring after echocardiography. However, a recent meta-analysis of 7 studies (3253 patients) of left-sided IE found vegetation size  $> 10$  mm to be associated with any EEs but not with new EEs occurring after admission, echocardiography, or antibiotic therapy initiation [33]. Another meta-analysis of 21 studies (6646 patients) including both left- and right-sided IE found native valve vegetation size  $> 10$  mm to be significantly associated with increased odds of any EE, but did not examine the relationship with post-admission or post-echocardiography EEs [34].

We found that increased rates of any EE were associated with definite IE according to Duke criteria [30, 35] and absence of malignancy [17], but not with coagulase-negative staphylococcal or viridans group streptococcal infections [14, 17, 24], in keeping with prior reports. We did not observe an association between EEs and *Staphylococcus aureus* infection despite previous observations [6, 12–17]. Cancer patients with indwelling vascular devices and probable but not definite endocarditis may have confounded this association.

A randomized controlled trial of early surgery for mobile left-sided vegetations demonstrated reductions in EEs, and consideration of early surgery has been incorporated into practice guidelines [36]. The present findings emphasize that the majority of EEs occur prior to or



**Table 3. Echocardiographic characteristics of patients with an embolic event occurring after echocardiography.**

| Echocardiographic Characteristic        | All patients (n = 84) <sup>a</sup>                   | Patients with EE (n = 11) <sup>b</sup> | Patients without EE (n = 73) | Odds Ratio (95% CI)           | P value |
|-----------------------------------------|------------------------------------------------------|----------------------------------------|------------------------------|-------------------------------|---------|
| <b>Number of valves with vegetation</b> |                                                      |                                        |                              |                               | 0.41    |
| None                                    | 34 (40.5%)                                           | 3 (27.3%)                              | 31 (42.5%)                   | 1                             |         |
| Single                                  | 45 (53.6%)                                           | 8 (72.7%)                              | 37 (50.7%)                   | 2.21 (0.48–14.06)             | 0.42    |
| Bi-valvular                             | 5 (6.0%)                                             | 0 (0%)                                 | 5 (6.9%)                     | 1.75 (0–12.87)                | 0.65    |
|                                         | <b>Patients with valves with vegetation (n = 50)</b> | <b>(n = 8)</b>                         | <b>(n = 42)</b>              |                               |         |
| <b>Valve type</b>                       |                                                      |                                        |                              |                               |         |
| Native                                  | 43 (86.0%)                                           | 6 (75.0%)                              | 37 (88.1%)                   | 1                             |         |
| Prosthetic                              | 7 (14.0%)                                            | 2 (25.0%)                              | 5 (11.9%)                    | 2.47 (0.39–15.73)             | 0.34    |
| <b>Valve location</b>                   |                                                      |                                        |                              |                               | 0.26    |
| Aortic                                  | 27 (54.0%)                                           | 3 (37.5%)                              | 24 (57.1%)                   | 1                             |         |
| Mitral                                  | 18 (36.0%)                                           | 5 (62.5%)                              | 13 (31.0%)                   | 3.00 (0.49–22.46)             | 0.30    |
| Bivalvular                              | 5 (10.0%)                                            | 0 (0%)                                 | 5 (11.9%)                    | 1.37 (0–10.10)                | 0.59    |
| <b>Vegetation size</b>                  |                                                      |                                        |                              |                               |         |
| Size <10 mm                             | 31 (62.0%)                                           | 4 (50.0%)                              | 27 (64.3%)                   | 1                             |         |
| Size ≥10 mm                             | 19 (38.0%)                                           | 4 (50.0%)                              | 15 (35.7%)                   | 1.80 (0.39–8.25)              | 0.45    |
| Size (mean, in mm)                      | 9.7 (5.5)                                            | 11.8 (5.9)                             | 9.3 (5.4)                    | 1.08 (0.95–1.23) <sup>c</sup> | 0.25    |
| <b>Vegetation mobility</b>              |                                                      |                                        |                              |                               | 0.92    |
| Grade 1                                 | 3 (6.0%)                                             | 0 (0%)                                 | 3 (7.1%)                     | 1                             |         |
| Grade 2                                 | 21 (42.0%)                                           | 3 (37.5%)                              | 18 (42.9%)                   | 0.56 (0.07–∞)                 | 0.66    |
| Grade 3                                 | 7 (14.0%)                                            | 1 (12.5%)                              | 6 (14.3%)                    | 0.43 (0.02–∞)                 | 0.70    |
| Grade 4                                 | 19 (38.0%)                                           | 4 (50.0%)                              | 15 (35.7%)                   | 0.90 (0.12–∞)                 | 0.53    |
| <b>Vegetation extent</b>                |                                                      |                                        |                              |                               | 0.39    |
| Grade 1                                 | 22 (44.0%)                                           | 2 (25.0%)                              | 20 (47.6%)                   | 1                             |         |
| Grade 2                                 | 9 (18.0%)                                            | 1 (12.5%)                              | 8 (19.1%)                    | 1.25 (0.10–15.80)             | 0.86    |
| Grade 3                                 | 14 (28.0%)                                           | 3 (37.5%)                              | 11 (26.2%)                   | 2.73 (0.39–18.88)             | 0.31    |
| Grade 4                                 | 5 (10.0%)                                            | 2 (25.0%)                              | 3 (7.1%)                     | 6.67 (0.67–66.84)             | 0.11    |

CI, confidence interval; EE, embolic event

<sup>a</sup>The total sample excludes patients who had EEs exclusively before echocardiography.

<sup>b</sup>Of 11 patients with EEs, 8 had vegetations: 5 had a single EE after echocardiography, 1 had two EEs after echocardiography, and 2 had one EE before and one EE after echocardiography. The 3 patients without vegetations each had 1 EE after echocardiography.

<sup>c</sup>Odds Ratio per 1-mm increase in vegetation size.

<https://doi.org/10.1371/journal.pone.0215924.t003>

at the time of admission; subsequent events are infrequent, in keeping with previous reports suggesting that embolism is uncommon after initiation of antibiotics [2].

This study has several limitations, which may limit its generalizability. As the study was conducted in a single tertiary care university-affiliated hospital that receives transfers from other institutions, the findings may be subject to referral bias. Retrospective data may be subject to under-detection of outcomes due to unreported complications or incomplete chart documentation, limitations less applicable to the phase of the study with prospective patient identification. The small number of EEs after echocardiography limited statistical power. Inclusion of a high proportion of probable IE patients (31% compared to 7–11% seen in large multicentre studies [9, 17, 30]), of which a majority had no echocardiographic findings, may have also diluted the observed associations. Finally, the performance of cardiac surgery may have reduced the risk of a subsequent EE.

## Conclusions

The present study validates a global association between conventional clinical and echocardiographic variables and systemic embolism, while suggesting that the predictive value of echocardiographic variables may be time-sensitive. These results illustrate limitations inherent in studies that combine prospective and retrospective associations with embolism and serve as a caveat emphasizing the importance of a comprehensive evaluation when applying practice guidelines in planning surgical intervention.

## Supporting information

**S1 Appendix. Additional information about the study.** The file consists of (1) Strengthening the Reporting of Observational studies in Epidemiology (STROBE) checklist; (2) Table A: Clinical course of patients with an embolic event occurring after echocardiography; and (3) Table B: Patient and pathogen characteristics of patients with or without the primary outcome of an embolic event after echocardiography.  
(PDF)

**S1 Video. Example of a small fixed mitral valve vegetation (Grade 1 for both mobility and extent).**  
(AVI)

**S2 Video. Example of large multiple mobile mitral valve vegetations (Grade 4 for mobility and Grade 2 for extent).**  
(AVI)

## Acknowledgments

We thank Asgar Rishu for contributions to data collection.

## Author Contributions

**Conceptualization:** Alvin Yang, Neill K. J. Adhikari, Nick Daneman, Mark S. Hansen.

**Formal analysis:** Alvin Yang, Ruxandra Pinto.

**Funding acquisition:** Alvin Yang, Nick Daneman.

**Investigation:** Alvin Yang, Charlie Tan, Bennett K. M. Haynen, Mark S. Hansen.

**Methodology:** Alvin Yang, Neill K. J. Adhikari, Nick Daneman, Ruxandra Pinto, Mark S. Hansen.

**Project administration:** Neill K. J. Adhikari, Nick Daneman, Mark S. Hansen.

**Supervision:** Neill K. J. Adhikari, Nick Daneman, Mark S. Hansen.

**Writing – original draft:** Alvin Yang.

**Writing – review & editing:** Alvin Yang, Charlie Tan, Neill K. J. Adhikari, Nick Daneman, Ruxandra Pinto, Bennett K. M. Haynen, Gideon Cohen, Mark S. Hansen.

## References

1. Habib G, Lancellotti P, Antunes MJ, Bongioni MG, Casalta JP, Del Zotti F, et al. 2015 ESC Guidelines for the management of infective endocarditis. *Eur Heart J.* 2015; 36(44):3075–123. <https://doi.org/10.1093/eurheartj/ehv319> PMID: 26320109

2. Hubert S, Thuny F, Resseguier N, Giorgi R, Tribouilloy C, Le Dolley Y, et al. Prediction of symptomatic embolism in infective endocarditis: construction and validation of a risk calculator in a multicenter cohort. *J Am Coll Cardiol*. 2013; 62(15):1384–92. <https://doi.org/10.1016/j.jacc.2013.07.029> PMID: 23906859
3. Gotsman I, Meirovitz A, Meizlish N, Gotsman M, Lotan C, Gilon D. Clinical and echocardiographic predictors of morbidity and mortality in infective endocarditis: The significance of vegetation size. *Isr Med Assoc J*. 2007; 9(5):365–9. PMID: 17591374
4. Deprele C, Berthelot P, Lemetayer F, Comtet C, Fresard A, Cazorla C, et al. Risk factors for systemic emboli in infective endocarditis. *Clin Microbiol Infect*. 2004; 10(1):46–53. PMID: 14706086
5. Thuny F, Di Salvo G, Belliard O, Avierinos JF, Pergola V, Rosenberg V, et al. Risk of embolism and death in infective endocarditis: prognostic value of echocardiography: a prospective multicenter study. *Circulation*. 2005; 112(1):69–75. <https://doi.org/10.1161/CIRCULATIONAHA.104.493155> PMID: 15983252
6. Hill EE, Herijgers P, Claus P, Vanderschueren S, Peetermans WE, Herregods MC. Clinical and echocardiographic risk factors for embolism and mortality in infective endocarditis. *Eur J Clin Microbiol Infect Dis*. 2008; 27(12):1159–64. <https://doi.org/10.1007/s10096-008-0572-9> PMID: 18629556
7. Macarie C, Iliuta L, Savulescu C, Moldovan H, Gherghiceanu DP, Vasile R, et al. Echocardiographic predictors of embolic events in infective endocarditis. *Kardiol Pol*. 2004; 60(6):535–40. PMID: 15334153
8. Berdejo J, Shibayama K, Harada K, Tanaka J, Mihara H, Gurudevan SV, et al. Evaluation of vegetation size and its relationship with embolism in infective endocarditis: a real-time 3-dimensional transesophageal echocardiography study. *Circulation*. 2014; Cardiovascular imaging. 7(1):149–54. <https://doi.org/10.1161/CIRCIMAGING.113.000938> PMID: 24214886
9. Garcia-Cabrera E, Fernandez-Hidalgo N, Almirante B, Ivanova-Georgieva R, Noureddine M, Plata A, et al. Neurological complications of infective endocarditis: risk factors, outcome, and impact of cardiac surgery: a multicenter observational study. *Circulation*. 2013; 127(23):2272–84. <https://doi.org/10.1161/CIRCULATIONAHA.112.000813> PMID: 23648777
10. Hong TC, Chou YS, Tsai CH, Wu TC. Ten-year study of infective endocarditis: Clinical features at different locations. *Acta Cardiol Sin*. 1999; 15(4):193–200.
11. Cabell CH, Pond KK, Peterson GE, Durack DT, Corey GR, Anderson DJ, et al. The risk of stroke and death in patients with aortic and mitral valve endocarditis. *Am Heart J*. 2001; 142(1):75–80. <https://doi.org/10.1067/mhj.2001.115790> PMID: 11431660
12. Fabri J Jr., Issa VS, Pomerantzeff PM, Grinberg M, Barretto AC, Mansur AJ. Time-related distribution, risk factors and prognostic influence of embolism in patients with left-sided infective endocarditis. *Int J Cardiol*. 2006; 110(3):334–9. <https://doi.org/10.1016/j.ijcard.2005.07.016> PMID: 16213607
13. Kjerulf A, Tvede M, Aldershvile J, Hoiby N. Bacterial endocarditis at a tertiary hospital—how do we improve diagnosis and delay of treatment? A retrospective study of 140 patients. *Cardiology*. 1998; 89(2):79–86. <https://doi.org/10.1159/00006761> PMID: 9524007
14. Snygg-Martin U, Gustafsson L, Rosengren L, Alsio A, Ackerholm P, Andersson R, et al. Cerebrovascular complications in patients with left-sided infective endocarditis are common: a prospective study using magnetic resonance imaging and neurochemical brain damage markers. *Clin Infect Dis*. 2008; 47(1):23–30. <https://doi.org/10.1086/588663> PMID: 18491965
15. Hsieh JC, Wang LY, Chang HR, Chao SF, Wang JH. Clinical characteristics and in-hospital prognosis of infective endocarditis in two eastern counties of Taiwan. *Acta Cardiol Sin*. 2014; 30(2):151–6. PMID: 27122782
16. Iung B, Tubiana S, Klein I, Messika-Zeitoun D, Brochet E, Lepage L, et al. Determinants of cerebral lesions in endocarditis on systematic cerebral magnetic resonance imaging: a prospective study. *Stroke*. 2013; 44(11):3056–62. <https://doi.org/10.1161/STROKEAHA.113.001470> PMID: 24003046
17. Rizzi M, Rvasio V, Carobbio A, Mattucci I, Crapis M, Stellini R, et al. Predicting the occurrence of embolic events: an analysis of 1456 episodes of infective endocarditis from the Italian Study on Endocarditis (SEI). *BMC Infect Dis*. 2014; 14:230. <https://doi.org/10.1186/1471-2334-14-230> PMID: 24779617
18. Lancellotti P, Galiuto L, Albert A, Soyeur D, Pierard LA. Relative value of clinical and transesophageal echocardiographic variables for risk stratification in patients with infective endocarditis. *Clin Cardiol*. 1998; 21(8):572–8. PMID: 9702384
19. Huang TY, Tseng HK, Liu CP, Lee CM. Comparison of the clinical manifestations of infective endocarditis between elderly and young patients—A 3-year study. *J Microbiol Immunol Infect*. 2009; 42(2):154–9. PMID: 19597648
20. Chao TH, Li YH, Tsai WC, Lin LJ, Chen JH, Tsai LM, et al. Clinical characteristics and prognostic determinants of infective endocarditis in adult intravenous drug users. *J Formos Med Assoc*. 2004; 103(10):754–60. PMID: 15490025

21. Leitman M, Dreznik Y, Tyomkin V, Fuchs T, Krakover R, Vered Z. Vegetation size in patients with infective endocarditis. *Eur Heart J Cardiovasc Imaging*. 2012; 13(4):330–8. <https://doi.org/10.1093/ejehocard/jer253> PMID: 22109247
22. Kang DH, Kim YJ, Kim SH, Sun BJ, Kim DH, Yun SC, et al. Early surgery versus conventional treatment for infective endocarditis. *N Engl J Med*. 2012; 366(26):2466–73. <https://doi.org/10.1056/NEJMoa1112843> PMID: 22738096
23. Baddour LM, Wilson WR, Bayer AS, Fowler VG Jr., Tleyjeh IM, Rybak MJ, et al. Infective endocarditis in adults: diagnosis, antimicrobial therapy, and management of complications: a scientific statement for healthcare professionals from the American Heart Association. *Circulation*. 2015; 132(15):1435–86. <https://doi.org/10.1161/CIR.000000000000296> PMID: 26373316
24. Castineira-Busto M, Abu-Assi E, Martinez-Monzonis A, Pena-Gil C, Raposeiras-Roubin S, Gonzalez-Juanatey JR. Predicting the risk of systemic septic embolism in patients with infective endocarditis. *Rev Esp Cardiol*. 2015; 68(1):78–9. <https://doi.org/10.1016/j.rec.2014.08.007> PMID: 25481617
25. Sery A, Valeyrie-Allanore L, Alla F, Lechiche C, Nazeyrollas P, Chidiac C, et al. Prognostic value of skin manifestations of infective endocarditis. *JAMA Dermatol*. 2014; 150(5):494–500. <https://doi.org/10.1001/jamadermatol.2013.8727> PMID: 24500311
26. Von Elm E, Altman DG, Egger M, Pocock SJ, Gøtzsche PC, Vandenbroucke JP. STROBE Initiative. The Strengthening the Reporting of Observational Studies in Epidemiology (STROBE) statement: guidelines for reporting observational studies. *J Clin Epidemiol*. 2008; 61(4):344–9. <https://doi.org/10.1016/j.jclinepi.2007.11.008> PMID: 18313558
27. Li J, Sexton DJ, Mick N, Nettles R, Fowler Jr VG, Ryan T, et al. Proposed modifications to the Duke criteria for the diagnosis of infective endocarditis. *Clin Infect Dis*. 2000; 30:633–8. <https://doi.org/10.1086/313753> PMID: 10770721
28. Tan C, Hansen M, Cohen G, Boyle K, Daneman N, Adhikari NK. Accuracy of administrative data for identification of patients with infective endocarditis. *Int J Cardiol*. 2016; 224:162–4. <https://doi.org/10.1016/j.ijcard.2016.09.030> PMID: 27657467
29. Tan C, Hansen MS, Cohen G, Boyle K, Yang A, Rishu A, et al. Case conferences for infective endocarditis: a quality improvement initiative. *PLoS ONE*. 2018; 13(10):e0205528. <https://doi.org/10.1371/journal.pone.0205528> PMID: 30308071
30. Olmos C, Vilacosta I, Sarria C, Fernandez C, Lopez J, Ferrera C, et al. Characterization and clinical outcome of patients with possible infective endocarditis. *Int J Cardiol*. 2015; 178:31–3. <https://doi.org/10.1016/j.ijcard.2014.10.171> PMID: 25464213
31. De Castro S, Magni G, Beni S, Cartoni D, Fiorelli M, Venditti M, et al. Role of transthoracic and transesophageal echocardiography in predicting embolic events in patients with active infective endocarditis involving native cardiac valves. *Am J Cardiol*. 1997; 80(8):1030–4. PMID: 9352973
32. Di Salvo G, Habib G, Pergola V, Avierinos JF, Philip E, Casalta JP, et al. Echocardiography predicts embolic events in infective endocarditis. *J Am Coll Cardiol*. 2001; 37(4):1069–76. PMID: 11263610
33. Yang A, Tan C, Daneman N, Hansen MS, Habib G, Salaun E, et al. Clinical and echocardiographic predictors of embolism in infective endocarditis: systematic review and meta-analysis. *Clin Microbiol Infect*. 2019; 25(2):178–187. <https://doi.org/10.1016/j.cmi.2018.08.010> PMID: 30145401
34. Mohananey D, Mohadjer A, Pettersson G, Navia J, Gordon S, Shrestha N, et al. Association of vegetation size with embolic risk in patients with infective endocarditis: a systematic review and meta-analysis. *JAMA Intern Med*. 2018; 178(4):502–10. <https://doi.org/10.1001/jamainternmed.2017.8653> PMID: 29459947
35. Ryu HM, Bae MH, Lee SH, Lee JH, Kwon YS, Yang DH, et al. Presence of conduction abnormalities as a predictor of clinical outcomes in patients with infective endocarditis. *Heart and Vessels*. 2011; 26(3):298–305. <https://doi.org/10.1007/s00380-010-0055-7> PMID: 21052686
36. Baddour LM, Wilson WR, Bayer AS, Fowler VG, Tleyjeh IM, Rybak MJ, et al. Infective endocarditis in adults: Diagnosis, antimicrobial therapy, and management of complications: A scientific statement for healthcare professionals from the American Heart Association. *Circulation*. 2015; 132(15):1435–86. <https://doi.org/10.1161/CIR.000000000000296> PMID: 26373316
