# Supplementary material for: Time-sensitive predictors of embolism in patients with left-sided endocarditis: Cohort study
Source: PubMed Central journal article supplement (PMC6483226; doi:10.1371/journal.pone.0215924), 2019-04-25
Supplement: pone.0215924.s001.pdf [file pone.0215924.s001.pdf]

## S1 Appendix

**Strengthening the Reporting of Observational studies in Epidemiology (STROBE) checklist** of items that should be included in reports of *cohort studies*

|                              | <b>Item No</b> | <b>Recommendation</b>                                                                                                                                                                                                                                                                                                                                                                                                                             |
|------------------------------|----------------|---------------------------------------------------------------------------------------------------------------------------------------------------------------------------------------------------------------------------------------------------------------------------------------------------------------------------------------------------------------------------------------------------------------------------------------------------|
| <b>Title and abstract</b>    | 1              | (a) Indicate the study's design with a commonly used term in the title or the abstract ( <b>p. 1</b> )<br>(b) Provide in the abstract an informative and balanced summary of what was done and what was found ( <b>p. 2</b> )                                                                                                                                                                                                                     |
| <b>Introduction</b>          |                |                                                                                                                                                                                                                                                                                                                                                                                                                                                   |
| Background/rationale         | 2              | Explain the scientific background and rationale for the investigation being reported ( <b>p. 3</b> )                                                                                                                                                                                                                                                                                                                                              |
| Objectives                   | 3              | State specific objectives, including any prespecified hypotheses ( <b>p. 3</b> )                                                                                                                                                                                                                                                                                                                                                                  |
| <b>Methods</b>               |                |                                                                                                                                                                                                                                                                                                                                                                                                                                                   |
| Study design                 | 4              | Present key elements of study design early in the paper ( <b>p. 3</b> )                                                                                                                                                                                                                                                                                                                                                                           |
| Setting                      | 5              | Describe the setting, locations, and relevant dates, including periods of recruitment, exposure, follow-up, and data collection ( <b>pp. 3-4</b> )                                                                                                                                                                                                                                                                                                |
| Participants                 | 6              | (a) Give the eligibility criteria, and the sources and methods of selection of participants. Describe methods of follow-up ( <b>p. 4</b> )<br>(b) For matched studies, give matching criteria and number of exposed and unexposed ( <b>not applicable</b> )                                                                                                                                                                                       |
| Variables                    | 7              | Clearly define all outcomes, exposures, predictors, potential confounders, and effect modifiers. Give diagnostic criteria, if applicable ( <b>pp. 4-5</b> )                                                                                                                                                                                                                                                                                       |
| Data sources/<br>measurement | 8*             | For each variable of interest, give sources of data and details of methods of assessment (measurement). Describe comparability of assessment methods if there is more than one group ( <b>pp. 4-5</b> )                                                                                                                                                                                                                                           |
| Bias                         | 9              | Describe any efforts to address potential sources of bias ( <b>pp.4- 5</b> )                                                                                                                                                                                                                                                                                                                                                                      |
| Study size                   | 10             | Explain how the study size was arrived at ( <b>p. 6</b> )                                                                                                                                                                                                                                                                                                                                                                                         |
| Quantitative variables       | 11             | Explain how quantitative variables were handled in the analyses. If applicable, describe which groupings were chosen and why ( <b>p. 6</b> )                                                                                                                                                                                                                                                                                                      |
| Statistical methods          | 12             | (a) Describe all statistical methods, including those used to control for confounding ( <b>pp. 6-7</b> )<br>(b) Describe any methods used to examine subgroups and interactions ( <b>not applicable</b> )<br>(c) Explain how missing data were addressed ( <b>not applicable</b> )<br>(d) If applicable, explain how loss to follow-up was addressed ( <b>not applicable</b> )<br>(e) Describe any sensitivity analyses ( <b>not applicable</b> ) |
| <b>Results</b>               |                |                                                                                                                                                                                                                                                                                                                                                                                                                                                   |
| Participants                 | 13*            | (a) Report numbers of individuals at each stage of study—eg numbers potentially eligible, examined for eligibility, confirmed eligible, included in the study, completing follow-up, and analysed ( <b>p. 7</b> )<br>(b) Give reasons for non-participation at each stage ( <b>not applicable</b> )<br>(c) Consider use of a flow diagram ( <b>not applicable</b> )                                                                               |

|                          |     |                                                                                                                                                                                                                                                                                                                                                                                                                                                                                                         |
|--------------------------|-----|---------------------------------------------------------------------------------------------------------------------------------------------------------------------------------------------------------------------------------------------------------------------------------------------------------------------------------------------------------------------------------------------------------------------------------------------------------------------------------------------------------|
| Descriptive data         | 14* | (a) Give characteristics of study participants (eg demographic, clinical, social) and information on exposures and potential confounders ( <b>p. 7, Table 1</b> )<br><hr/> (b) Indicate number of participants with missing data for each variable of interest ( <b>not applicable</b> )<br><hr/> (c) Summarise follow-up time (eg, average and total amount) ( <b>not applicable</b> )                                                                                                                 |
| Outcome data             | 15* | Report numbers of outcome events or summary measures over time ( <b>Table 1, Table 2, Table 3</b> )                                                                                                                                                                                                                                                                                                                                                                                                     |
| Main results             | 16  | (a) Give unadjusted estimates and, if applicable, confounder-adjusted estimates and their precision (eg, 95% confidence interval). Make clear which confounders were adjusted for and why they were included ( <b>p. 11, p. 13</b> )<br><hr/> (b) Report category boundaries when continuous variables were categorized ( <b>Table 2, Table 3</b> )<br><hr/> (c) If relevant, consider translating estimates of relative risk into absolute risk for a meaningful time period ( <b>not applicable</b> ) |
| Other analyses           | 17  | Report other analyses done—eg analyses of subgroups and interactions, and sensitivity analyses ( <b>not applicable</b> )                                                                                                                                                                                                                                                                                                                                                                                |
| <b>Discussion</b>        |     |                                                                                                                                                                                                                                                                                                                                                                                                                                                                                                         |
| Key results              | 18  | Summarise key results with reference to study objectives ( <b>pp. 13-14</b> )                                                                                                                                                                                                                                                                                                                                                                                                                           |
| Limitations              | 19  | Discuss limitations of the study, taking into account sources of potential bias or imprecision. Discuss both direction and magnitude of any potential bias ( <b>pp. 14-15</b> )                                                                                                                                                                                                                                                                                                                         |
| Interpretation           | 20  | Give a cautious overall interpretation of results considering objectives, limitations, multiplicity of analyses, results from similar studies, and other relevant evidence ( <b>pp. 13-15</b> )                                                                                                                                                                                                                                                                                                         |
| Generalisability         | 21  | Discuss the generalisability (external validity) of the study results ( <b>p. 14</b> )                                                                                                                                                                                                                                                                                                                                                                                                                  |
| <b>Other information</b> |     |                                                                                                                                                                                                                                                                                                                                                                                                                                                                                                         |
| Funding                  | 22  | Give the source of funding and the role of the funders for the present study and, if applicable, for the original study on which the present article is based ( <b>see separate funding statement</b> )                                                                                                                                                                                                                                                                                                 |

\*Information given separately for exposed and unexposed groups.

Note that page numbers refer to the Microsoft Word version of the revised manuscript.

**Table A. Clinical course of patients with an embolic event occurring after echocardiography.**

| Patient #<br>(age and sex) | Echocardiography               |                                                   | Embolic Event                                                                            | Management                                                                   | Vital status at hospital discharge |
|----------------------------|--------------------------------|---------------------------------------------------|------------------------------------------------------------------------------------------|------------------------------------------------------------------------------|------------------------------------|
|                            | Days after admission performed | Vegetation description                            |                                                                                          |                                                                              |                                    |
| 1<br>(42M)                 | 0                              | Single 9 mm vegetation on prosthetic aortic valve | 1 non-stroke EE occurring 21 days after echocardiography                                 | Antibiotic therapy + aortic valve replacement 19 days after echocardiography | Dead                               |
| 2<br>(46M)                 | 1                              | Single 6 mm vegetation on native mitral valve     | 1 stroke occurring 1 day after echocardiography                                          | Antibiotic therapy                                                           | Alive                              |
| 3<br>(51M)                 | 2                              | None                                              | 1 stroke occurring 4 days after echocardiography                                         | Antibiotic therapy                                                           | Alive                              |
| 4<br>(67M)                 | 15                             | Single 17 mm vegetation on native aortic valve    | 2 strokes occurring 20 days before and 22 days after echocardiography                    | Antibiotic therapy                                                           | Alive                              |
| 5<br>(86M)                 | 2                              | None                                              | 1 stroke occurring 26 days after echocardiography                                        | Antibiotic therapy                                                           | Alive                              |
| 6<br>(79F)                 | 10                             | Single 5 mm vegetation prosthetic mitral valve    | 1 stroke occurring 4 days after echocardiography                                         | Antibiotic therapy                                                           | Dead                               |
| 7<br>(42M)                 | 1                              | Single 15 mm vegetation on native aortic valve    | 2 strokes occurring 1 day before and 11 days after echocardiography                      | Antibiotic therapy                                                           | Alive                              |
| 8<br>(44M)                 | 0                              | Single 20 mm vegetation on native mitral valve    | 1 non-stroke EE and 1 stroke occurring 2 and 17 days after echocardiography respectively | Antibiotic therapy + mitral valve replacement 1 day after echocardiography   | Alive                              |
| 9<br>(86F)                 | 1                              | None                                              | 1 stroke occurring 2 days after echocardiography                                         | Antibiotic therapy                                                           | Alive                              |
| 10<br>(41M)                | 0                              | Single 16 mm vegetation on native mitral valve    | 1 stroke occurring 2 days after echocardiography                                         | Antibiotic therapy + mitral valve replacement 5 days after echocardiography  | Alive                              |
| 11<br>(75F)                | 1                              | Single 6 mm vegetation on native mitral valve     | 1 stroke occurring 2 days after echocardiography                                         | Antibiotic therapy                                                           | Alive                              |

EE, embolic event; M, male; F, female

**Table B. Patient and pathogen characteristics of patients with or without the primary outcome of an embolic event after echocardiography.**

| Characteristic                           | Total Population (n=116) | Patients with primary outcome (n=11) | Patients without primary outcome (n=105) | Odds Ratio (95% CI) | P value |
|------------------------------------------|--------------------------|--------------------------------------|------------------------------------------|---------------------|---------|
| <b>Demographic characteristics</b>       |                          |                                      |                                          |                     |         |
| Mean age in years (SD)                   | 66 (17)                  | 60 (19)                              | 67 (17)                                  | 0.98 (0.95-1.01)    | 0.23    |
| Men                                      | 82 (70.7%)               | 8 (72.7%)                            | 74 (70.5%)                               | 1.12 (0.28-4.49)    | 0.88    |
| Direct admission                         | 71 (61.2%)               | 5 (45.5%)                            | 66 (62.9%)                               | 0.49 (0.14-1.72)    | 0.27    |
| Definite Duke Criteria                   | 80 (69.0%)               | 9 (81.8%)                            | 71 (67.6%)                               | 2.16 (0.44-10.52)   | 0.34    |
| <b>Comorbidities and risk factors</b>    |                          |                                      |                                          |                     |         |
| Coronary artery disease                  | 34 (29.3%)               | 3 (27.3%)                            | 31 (29.5%)                               | 0.90 (0.22-3.60)    | 0.88    |
| Coronary artery bypass grafting          | 15 (12.9%)               | 0 (0%)                               | 15 (14.3%)                               | 0.40 (0-2.09)       | 0.20    |
| Prosthetic valve(s)                      | 39 (33.6%)               | 3 (27.3%)                            | 36 (34.3%)                               | 0.72 (0.18-2.88)    | 0.64    |
| Unrepaired valve lesion                  | 23 (19.8%)               | 2 (18.2%)                            | 21 (20.0%)                               | 0.89 (0.18-4.43)    | 0.89    |
| Intracardiac device                      | 13 (11.2%)               | 0 (0%)                               | 13 (12.4%)                               | 0.48 (0-2.49)       | 0.25    |
| Prior infective endocarditis             | 12 (10.3%)               | 1 (9.1%)                             | 11 (10.5%)                               | 0.86 (0.10-7.33)    | 0.89    |
| Intravenous drug use                     | 7 (6.0%)                 | 1 (9.1%)                             | 6 (5.7%)                                 | 1.65 (0.18-15.11)   | 0.66    |
| Intravenous instrumentation <sup>a</sup> | 6 (5.2%)                 | 1 (9.1%)                             | 5 (4.8%)                                 | 2.00 (0.21-18.85)   | 0.54    |
| Hypertension                             | 61 (52.6%)               | 6 (54.6%)                            | 55 (52.4%)                               | 1.09 (0.31-3.80)    | 0.89    |
| Diabetes mellitus                        | 27 (23.3%)               | 2 (18.2%)                            | 25 (23.8%)                               | 0.71 (0.14-3.51)    | 0.68    |
| Cerebrovascular disease                  | 28 (24.1%)               | 2 (18.2%)                            | 26 (24.8%)                               | 0.68 (0.14-3.33)    | 0.63    |
| Chronic kidney disease                   | 23 (19.8%)               | 2 (18.2%)                            | 21 (20.0%)                               | 0.89 (0.18-4.43)    | 0.89    |
| Liver disease                            | 12 (10.3%)               | 0 (0%)                               | 12 (11.4%)                               | 0.52 (0-2.75)       | 0.28    |
| Chronic obstructive pulmonary disease    | 7 (6.0%)                 | 1 (9.1%)                             | 6 (5.7%)                                 | 1.65 (0.18-15.11)   | 0.66    |
| Malignancy                               | 29 (25.0%)               | 1 (9.1%)                             | 28 (26.7%)                               | 0.28 (0.03-2.25)    | 0.23    |
| Immunosuppression                        | 9 (7.8%)                 | 1 (9.1%)                             | 8 (7.6%)                                 | 1.21 (0.14-10.71)   | 0.86    |
| Obesity                                  | 7 (6.0%)                 | 1 (9.1%)                             | 6 (5.7%)                                 | 1.65 (0.18-15.11)   | 0.66    |
| <b>Microbiologic etiology</b>            |                          |                                      |                                          |                     |         |
| <i>Staphylococcus aureus</i>             | 27 (23.3%)               | 4 (36.4%)                            | 23 (21.9%)                               | 2.04 (0.55-7.57)    | 0.29    |
| Coagulase-negative staphylococcus        | 7 (6.0%)                 | 0 (0%)                               | 7 (6.7%)                                 | 0.96 (0-5.36)       | 0.49    |
| <i>Enterococcus</i>                      | 19 (16.4%)               | 0 (0%)                               | 19 (18.1%)                               | 0.30 (0-1.55)       | 0.13    |
| Viridans group streptococcus             | 24 (20.7%)               | 3 (27.3%)                            | 21 (20.0%)                               | 1.50 (0.37-6.15)    | 0.57    |
| HACEK group species <sup>b</sup>         | 2 (1.7%)                 | 0 (0%)                               | 2 (1.9%)                                 | 3.98 (0-34.18)      | 0.82    |
| Other microorganism                      | 32 (27.6%)               | 3 (27.3%)                            | 29 (27.6%)                               | 0.98 (0.24-3.96)    | 0.98    |
| Culture-negative                         | 8 (6.9%)                 | 1 (9.1%)                             | 7 (6.7%)                                 | 1.40 (0.16-12.56)   | 0.76    |

<sup>a</sup> Hemodialysis or central venous catheter

<sup>b</sup> *Haemophilus*, *Aggregatibacter*, *Cardiobacterium*, *Eikenella*, and *Kingella* spp.
